# Supplementary material for: Global, regional, and national burden of orofacial clefts, 1990–2021: an analysis of data from the global burden of disease study 2021
Source: Front Med (Lausanne). 2025 Jun 11;12:1609700. doi: 10.3389/fmed.2025.1609700 (PMC12187660; doi:10.3389/fmed.2025.1609700)
Supplement: Supplementary file 2 [file Supplementary_file_2.XLSX]

## Sheet: I
	location_name	Incidence_Number_1990	Incidence_ASR_1990	Incidence_Number_2021	Incidence_ASR_2021	EAPC_95%CI
27	Kazakhstan	2199.85 (1664.59,2784.45)	12.39 (9.38,15.69)	1245.08 (849.29,1694.96)	6.34 (4.33,8.64)	-2.63 (-2.77 to -2.49)
29	Mongolia	203.64 (132.49,294.46)	5.88 (3.82,8.5)	227.64 (146.7,339.18)	6.21 (4,9.25)	0.25 (0.02 to 0.48)
31	Turkmenistan	459.29 (320.88,610.19)	7.63 (5.33,10.13)	307.47 (216.5,410.75)	5.81 (4.09,7.76)	-0.87 (-0.98 to -0.76)
136	Bhutan	65.27 (43.95,90.16)	6.12 (4.12,8.45)	34.64 (24.27,48.77)	5.79 (4.05,8.15)	-0.29 (-0.51 to -0.08)
75	Norway	199.66 (137.24,269.88)	6.97 (4.79,9.43)	152.93 (97.38,212.69)	5.72 (3.64,7.95)	-0.75 (-1.03 to -0.47)
199	San Marino	0.84 (0.67,1.02)	7.13 (5.74,8.66)	0.63 (0.49,0.77)	5.66 (4.39,6.98)	-0.87 (-1.07 to -0.66)
25	Azerbaijan	640.21 (454.24,858.68)	7.19 (5.1,9.65)	359.76 (244.86,479.51)	5.58 (3.8,7.44)	-0.73 (-0.85 to -0.61)
24	Armenia	384.38 (291.24,483.65)	10.59 (8.02,13.32)	83.98 (56.14,116.62)	5.07 (3.39,7.04)	-2.68 (-2.77 to -2.59)
135	Bangladesh	11849.01 (8147.07,16291.71)	5.81 (4,7.99)	6449.7 (4492.82,8866.34)	4.81 (3.35,6.61)	-0.73 (-0.83 to -0.63)
139	Pakistan	10272.36 (7131.17,14311.93)	5.09 (3.54,7.1)	14168.16 (10768.41,18969.92)	4.74 (3.6,6.35)	-0.49 (-0.65 to -0.32)
30	Tajikistan	714.93 (496.18,933.05)	7.15 (4.96,9.33)	636.64 (436.83,897.36)	4.68 (3.21,6.6)	-1.42 (-1.54 to -1.29)
127	Qatar	32.28 (22.48,45.61)	5.9 (4.11,8.33)	86.5 (62.21,123.43)	4.66 (3.35,6.65)	-0.88 (-0.95 to -0.82)
32	Uzbekistan	2442.12 (1683.39,3276.7)	7.16 (4.94,9.61)	1742.61 (1164.41,2468.4)	4.55 (3.04,6.45)	-1.81 (-1.99 to -1.62)
138	Nepal	2140.74 (1465.71,2933.62)	5.68 (3.89,7.78)	1395.55 (999.11,1933.79)	4.53 (3.24,6.28)	-0.87 (-0.98 to -0.76)
28	Kyrgyzstan	541.48 (396.34,707.15)	8.52 (6.24,11.13)	330.91 (226.43,471.07)	4.4 (3.01,6.27)	-2.14 (-2.31 to -1.98)
55	Republic of Korea	2268.27 (1696.01,2816.03)	7.02 (5.25,8.72)	562.14 (367.7,775.45)	4.38 (2.86,6.04)	-2.06 (-2.32 to -1.79)
162	Botswana	108.9 (72.61,150.26)	4.89 (3.26,6.75)	101.61 (69.37,139.6)	4.37 (2.98,6)	-0.08 (-0.38 to 0.22)
26	Georgia	252.87 (176.98,338.72)	6.1 (4.27,8.17)	92.76 (66.75,124.34)	4.32 (3.11,5.79)	-1.16 (-1.25 to -1.06)
103	Peru	1480.08 (1082.33,1919.66)	4.79 (3.5,6.21)	1377.02 (943.73,1872.94)	4.26 (2.92,5.79)	-0.73 (-0.87 to -0.59)
120	Jordan	465.5 (335.78,631)	7.28 (5.25,9.87)	429.48 (316.55,575.65)	4.15 (3.06,5.56)	-2.03 (-2.26 to -1.8)
125	Palestine	279.44 (202.79,384.2)	6.61 (4.79,9.08)	236.55 (188.64,296.39)	4.1 (3.27,5.14)	-1.62 (-1.7 to -1.54)
79	Switzerland	220.24 (177.69,271.39)	5.44 (4.39,6.71)	169.95 (132.77,208.3)	4.02 (3.14,4.92)	-1.08 (-1.34 to -0.81)
131	Türkiye	4467.35 (3269.98,5911.39)	6.29 (4.6,8.32)	1923.94 (1384.69,2568.08)	3.97 (2.86,5.3)	-1.25 (-1.41 to -1.1)
166	Eswatini	66.88 (44.28,91.32)	4.32 (2.86,5.89)	54.65 (37.96,75.81)	3.94 (2.74,5.47)	-0.31 (-0.42 to -0.2)
3	Taiwan (Province of China)	342.22 (249.34,443.93)	2.19 (1.59,2.84)	292.45 (223.86,372.72)	3.86 (2.96,4.92)	2 (1.73 to 2.28)
53	Brunei Darussalam	16.13 (11.67,20.87)	4.77 (3.45,6.18)	11.37 (7.74,15.58)	3.85 (2.62,5.28)	-0.65 (-0.69 to -0.61)
64	Finland	220.77 (184.7,257.17)	6.99 (5.85,8.15)	88.64 (65.81,113.26)	3.81 (2.83,4.87)	-1.7 (-1.94 to -1.46)
67	Greece	199.97 (144.45,266.57)	3.97 (2.87,5.29)	150.99 (112.78,195.5)	3.8 (2.84,4.92)	-0.03 (-0.08 to 0.03)
35	Bulgaria	189.62 (125.08,258.2)	3.96 (2.61,5.4)	106 (70.32,146.12)	3.8 (2.52,5.24)	0.45 (0.21 to 0.69)
164	Namibia	112.51 (77.53,150.16)	4.57 (3.15,6.11)	103.4 (71.67,140.72)	3.76 (2.6,5.11)	-0.62 (-0.77 to -0.47)
42	Romania	967.95 (732.93,1210.12)	6.67 (5.05,8.33)	321.34 (219.51,430.6)	3.75 (2.56,5.02)	-1.87 (-1.96 to -1.77)
54	Japan	2663.52 (1938.55,3431.23)	4.45 (3.24,5.73)	1524.52 (1008.26,2071.86)	3.69 (2.44,5.01)	-0.43 (-0.57 to -0.29)
119	Iraq	1986.89 (1437,2598.38)	5.99 (4.33,7.83)	1454.73 (1074.22,2007.45)	3.66 (2.7,5.04)	-1.51 (-1.61 to -1.42)
86	Antigua and Barbuda	1.84 (1.38,2.37)	3.14 (2.36,4.05)	1.81 (1.34,2.37)	3.61 (2.67,4.72)	0.69 (0.48 to 0.9)
12	Thailand	1368.99 (961.81,1828)	2.75 (1.93,3.67)	920.58 (649.59,1259.1)	3.57 (2.52,4.88)	0.97 (0.86 to 1.07)
128	Saudi Arabia	1404.06 (994.07,1921.51)	5.72 (4.05,7.82)	790.56 (576.4,1092.54)	3.55 (2.59,4.91)	-1.75 (-1.88 to -1.62)
7	Malaysia	630.7 (445.43,825.19)	2.64 (1.86,3.45)	804.37 (580.98,1037.05)	3.5 (2.53,4.52)	0.94 (0.85 to 1.02)
167	Zimbabwe	712.69 (489.06,990.46)	3.83 (2.63,5.33)	780.47 (569.33,1057.03)	3.48 (2.54,4.72)	-0.45 (-0.57 to -0.32)
126	Oman	172.47 (121.86,238.79)	5 (3.53,6.92)	131.47 (96.46,186.13)	3.46 (2.54,4.9)	-1.04 (-1.15 to -0.93)
6	Lao People's Democratic Republic	208.53 (146.75,275.87)	2.5 (1.76,3.31)	291.4 (208.99,390.72)	3.46 (2.48,4.64)	1.07 (1.03 to 1.1)
169	Burkina Faso	825.51 (557.32,1126.74)	3.72 (2.51,5.07)	1566.07 (1078.37,2083.01)	3.44 (2.37,4.57)	-0.3 (-0.32 to -0.28)
179	Mali	797.86 (533.86,1075.92)	3.72 (2.49,5.02)	1741.17 (1200.01,2374.24)	3.41 (2.35,4.65)	-0.19 (-0.24 to -0.14)
9	Myanmar	1293.28 (908.28,1702.37)	2.41 (1.69,3.18)	1720.94 (1206.69,2273.68)	3.35 (2.35,4.42)	1.11 (1.03 to 1.2)
176	Guinea	580.32 (395.9,789.94)	4.16 (2.84,5.66)	797.96 (541.1,1095.24)	3.35 (2.27,4.6)	-0.89 (-1.01 to -0.77)
134	Afghanistan	1150.99 (818.22,1512.98)	5.44 (3.87,7.15)	1938.35 (1455.6,2575.82)	3.34 (2.51,4.43)	-1.55 (-1.66 to -1.44)
107	Guatemala	825.41 (624.77,1056.97)	4.97 (3.76,6.36)	475.94 (337.84,635.85)	3.34 (2.37,4.46)	-1.11 (-1.37 to -0.85)
163	Lesotho	94.49 (63.72,130.33)	3.68 (2.48,5.08)	67.65 (47.51,90.92)	3.34 (2.34,4.48)	-0.25 (-0.31 to -0.18)
137	India	50230.81 (35893.41,68894.71)	4.17 (2.98,5.72)	34995.08 (25415.71,47656.73)	3.33 (2.42,4.54)	-0.88 (-0.95 to -0.82)
172	Chad	578.61 (385.44,788.21)	3.77 (2.51,5.13)	1373.09 (958.91,1842.24)	3.32 (2.32,4.45)	-0.34 (-0.42 to -0.26)
157	Seychelles	1.94 (1.37,2.56)	2.46 (1.74,3.23)	2.51 (1.8,3.25)	3.31 (2.38,4.28)	0.99 (0.93 to 1.04)
184	Senegal	659.35 (450.31,878.72)	3.98 (2.72,5.3)	758.38 (534.11,1035.79)	3.29 (2.32,4.49)	-0.58 (-0.64 to -0.52)
168	Benin	448.39 (309.52,602.45)	3.93 (2.71,5.28)	825.08 (576.29,1112.54)	3.29 (2.3,4.43)	-0.65 (-0.79 to -0.51)
203	South Sudan	576.61 (398.97,772.91)	4.7 (3.25,6.3)	594.81 (400.37,806.41)	3.24 (2.18,4.4)	-0.94 (-1.17 to -0.71)
13	Timor-Leste	46.67 (32.24,61.9)	2.8 (1.93,3.71)	62.8 (44.78,84.33)	3.21 (2.29,4.31)	0.54 (0.39 to 0.69)
121	Kuwait	62.44 (43.07,94.31)	3.88 (2.67,5.85)	76.49 (55.72,109.74)	3.19 (2.33,4.58)	-0.57 (-0.68 to -0.46)
91	Dominica	2.54 (1.82,3.35)	2.84 (2.04,3.74)	0.98 (0.72,1.28)	3.16 (2.33,4.12)	0.55 (0.48 to 0.63)
155	Mozambique	1092.02 (727.32,1500.72)	3.73 (2.48,5.12)	1677.14 (1155.55,2274.87)	3.16 (2.18,4.29)	-0.52 (-0.69 to -0.35)
181	Niger	771.05 (533.85,1036.52)	3.61 (2.5,4.85)	1777.5 (1218.58,2406.91)	3.14 (2.15,4.25)	-0.53 (-0.58 to -0.48)
165	South Africa	1865.12 (1303.37,2511.59)	3.71 (2.59,4.99)	1479.64 (1058.1,1997.69)	3.13 (2.24,4.23)	-0.42 (-0.56 to -0.29)
185	Sierra Leone	399.94 (274.04,534.32)	4.11 (2.82,5.49)	451 (304.97,611.07)	3.12 (2.11,4.22)	-1.08 (-1.16 to -1.01)
56	Singapore	94.7 (67.83,118.92)	3.91 (2.8,4.91)	82.57 (53.69,113.71)	3.12 (2.03,4.3)	-0.61 (-0.79 to -0.42)
150	Ethiopia	4541.37 (3139.22,6174.92)	3.89 (2.69,5.29)	5181.77 (3605.76,7109.63)	3.1 (2.16,4.26)	-0.72 (-0.87 to -0.57)
159	United Republic of Tanzania	1858.63 (1248.09,2509.26)	3.22 (2.16,4.35)	2771.2 (1932.61,3739.78)	3.07 (2.14,4.14)	0.2 (0 to 0.4)
62	Cyprus	23.2 (16.32,31.56)	3.51 (2.47,4.78)	22.22 (15.17,29.98)	3.06 (2.09,4.12)	-0.45 (-0.63 to -0.27)
80	United Kingdom	1348.81 (995.13,1735.55)	3.53 (2.6,4.54)	1021.2 (696.13,1378.91)	3.05 (2.08,4.12)	-0.69 (-0.76 to -0.62)
204	Sudan	2139.73 (1525.36,2843.22)	5.1 (3.64,6.78)	1675.36 (1261.25,2185.42)	3.04 (2.29,3.97)	-1.77 (-1.94 to -1.59)
115	Algeria	1865.73 (1352.25,2439.16)	5.04 (3.65,6.59)	1325.92 (988.32,1783.64)	3.04 (2.27,4.09)	-1.6 (-1.67 to -1.54)
161	Zambia	696.33 (477.58,942.8)	3.8 (2.61,5.15)	880.58 (621.32,1209.51)	3.04 (2.15,4.18)	-0.53 (-0.63 to -0.43)
116	Bahrain	36.01 (26.76,46.72)	5.64 (4.19,7.32)	25.53 (19.07,34.29)	3.01 (2.25,4.05)	-2.19 (-2.25 to -2.13)
149	Eritrea	257.2 (173.18,353.64)	3.62 (2.44,4.98)	281.56 (197.17,379.98)	3.01 (2.11,4.06)	-0.65 (-0.89 to -0.41)
47	Estonia	54.12 (43.06,65.91)	5.24 (4.17,6.38)	18.72 (13.94,24.1)	3 (2.23,3.86)	-2.06 (-2.3 to -1.83)
4	Cambodia	512.96 (369.29,669.39)	2.49 (1.8,3.26)	510.83 (361.41,680.28)	2.98 (2.11,3.97)	0.24 (0.15 to 0.33)
197	Puerto Rico	65.03 (42.53,92.85)	2.07 (1.35,2.95)	26.16 (17.47,39.35)	2.96 (1.98,4.46)	1.62 (1.31 to 1.92)
122	Lebanon	196.92 (143.15,263.9)	4.81 (3.5,6.45)	111.32 (85.9,151)	2.93 (2.26,3.98)	-1.64 (-1.78 to -1.5)
117	Egypt	3736.23 (2696.86,4894.55)	4.14 (2.99,5.42)	3625.96 (2777.91,4844.38)	2.93 (2.25,3.92)	-1.09 (-1.25 to -0.93)
133	Yemen	1587.86 (1129.9,2131)	5.04 (3.58,6.76)	1366.12 (1050.15,1785)	2.93 (2.25,3.83)	-1.86 (-1.95 to -1.77)
147	Comoros	37.6 (24.74,51.04)	3.97 (2.61,5.39)	23.89 (16.5,32.55)	2.93 (2.02,3.99)	-1 (-1.1 to -0.9)
112	Venezuela (Bolivarian Republic of)	1159.06 (884.38,1423.74)	4.39 (3.35,5.39)	632.82 (437.22,881.74)	2.92 (2.01,4.06)	-1.01 (-1.23 to -0.79)
8	Maldives	11.92 (8.56,15.49)	2.8 (2.01,3.64)	8.43 (5.75,11.48)	2.92 (1.99,3.97)	0.05 (-0.01 to 0.1)
101	Bolivia (Plurinational State of)	427.56 (318.34,546.61)	3.91 (2.91,5)	340.87 (243.36,462.48)	2.91 (2.08,3.95)	-1 (-1.07 to -0.94)
66	Germany	1522.14 (1289.59,1756.84)	3.59 (3.05,4.15)	1087.52 (775.19,1425.42)	2.88 (2.05,3.77)	-0.89 (-1.14 to -0.64)
130	Tunisia	511.49 (371.29,655.3)	4.85 (3.52,6.22)	229.07 (175.43,305.74)	2.86 (2.19,3.81)	-1.86 (-1.95 to -1.76)
158	Somalia	646.58 (428.23,897.68)	3.48 (2.31,4.84)	1309.92 (908.86,1781.91)	2.84 (1.97,3.87)	-0.54 (-0.68 to -0.4)
129	Syrian Arab Republic	643.53 (488.08,864.21)	2.92 (2.21,3.92)	266.98 (204.86,358.64)	2.83 (2.17,3.8)	0.08 (-0.13 to 0.3)
72	Luxembourg	10.38 (7.5,13.42)	4.28 (3.1,5.54)	9.2 (6.39,12.4)	2.83 (1.97,3.81)	-1.51 (-1.6 to -1.42)
124	Morocco	1559.26 (1135.85,2115.31)	4.12 (3,5.58)	857.45 (660.83,1136.61)	2.8 (2.16,3.71)	-1.41 (-1.46 to -1.35)
11	Sri Lanka	414.98 (288.13,560.32)	2.41 (1.67,3.25)	405.15 (278.66,554.78)	2.8 (1.92,3.83)	0.67 (0.51 to 0.83)
173	C么te d'Ivoire	1029.4 (687.94,1373.28)	3.87 (2.59,5.17)	1249 (850.61,1716.77)	2.75 (1.87,3.78)	-1.27 (-1.34 to -1.19)
94	Guyana	29.1 (20.16,39.04)	2.33 (1.61,3.12)	19.61 (13.32,26.8)	2.73 (1.86,3.74)	0.87 (0.74 to 1.01)
109	Mexico	5399.42 (4075.51,6904.97)	4.43 (3.35,5.67)	2452.57 (1825.87,3157.01)	2.71 (2.01,3.48)	-1.33 (-1.45 to -1.21)
182	Nigeria	6796.39 (4608.09,9193.24)	3.47 (2.35,4.69)	10718.33 (7561.06,14528.24)	2.71 (1.91,3.67)	-0.53 (-0.67 to -0.38)
99	Suriname	8.93 (6.03,12.53)	2.03 (1.37,2.85)	11.53 (7.98,15.35)	2.7 (1.87,3.6)	1.26 (1.07 to 1.45)
10	Philippines	2266.25 (1636.32,2909.91)	2.34 (1.69,3)	2933.89 (2165.33,3788.84)	2.69 (1.98,3.47)	0.55 (0.44 to 0.66)
73	Malta	9.48 (7.54,11.54)	3.55 (2.82,4.32)	5.63 (4.05,7.35)	2.69 (1.94,3.51)	-0.64 (-0.93 to -0.35)
174	Gambia	88.26 (60.05,118.84)	4.07 (2.77,5.48)	99.72 (70.65,135.2)	2.69 (1.91,3.65)	-1.61 (-1.8 to -1.42)
74	Netherlands	386.37 (350.01,421.8)	4.06 (3.68,4.44)	230.3 (161.82,300.32)	2.69 (1.89,3.51)	-1.28 (-1.5 to -1.07)
59	Andorra	0.78 (0.54,1.04)	3.07 (2.11,4.12)	0.6 (0.39,0.82)	2.69 (1.77,3.69)	-0.15 (-0.33 to 0.03)
123	Libya	350.01 (249.16,467.2)	5.6 (3.98,7.47)	103.25 (78.82,136.12)	2.68 (2.05,3.53)	-2.27 (-2.4 to -2.13)
177	Guinea-Bissau	83.36 (56.14,113.72)	3.78 (2.55,5.16)	92.19 (64.22,126.13)	2.68 (1.87,3.67)	-1.27 (-1.48 to -1.07)
171	Cabo Verde	23.69 (16.46,31.02)	3.93 (2.73,5.15)	10.9 (7.6,14.74)	2.68 (1.87,3.62)	-1.41 (-1.53 to -1.29)
202	United States Virgin Islands	2.28 (1.52,3.18)	2.05 (1.37,2.86)	0.93 (0.63,1.32)	2.66 (1.79,3.78)	1.13 (0.93 to 1.33)
5	Indonesia	4727.49 (3264.71,6237.89)	2.1 (1.45,2.77)	5612.54 (3937.75,7450.04)	2.65 (1.86,3.52)	0.73 (0.68 to 0.79)
132	United Arab Emirates	109.34 (77.08,144.53)	4.71 (3.32,6.22)	96.66 (68.4,140.21)	2.64 (1.87,3.83)	-1.28 (-1.58 to -0.98)
152	Madagascar	937.69 (631.83,1277.07)	3.75 (2.53,5.1)	1068.05 (753.52,1449.9)	2.64 (1.86,3.58)	-1.13 (-1.29 to -0.97)
57	Australia	441.55 (409.44,478.82)	3.57 (3.31,3.87)	375.54 (256.28,510.76)	2.64 (1.8,3.59)	-0.72 (-0.98 to -0.46)
144	Equatorial Guinea	29.11 (19.62,38.76)	2.96 (1.99,3.94)	47.07 (31.54,64.63)	2.62 (1.75,3.6)	0.08 (-0.25 to 0.4)
45	Slovenia	32.56 (22.45,44.52)	3.04 (2.1,4.16)	23.31 (15.07,31.75)	2.61 (1.69,3.55)	-0.36 (-0.47 to -0.26)
175	Ghana	865.65 (580.41,1213.45)	2.99 (2,4.19)	1209.84 (830.47,1685.26)	2.6 (1.79,3.63)	-0.49 (-0.55 to -0.44)
180	Mauritania	147.54 (99.18,203.82)	3.55 (2.39,4.91)	167.47 (112.94,231.89)	2.58 (1.74,3.57)	-1.16 (-1.24 to -1.08)
118	Iran (Islamic Republic of)	3114.53 (2262.26,4067.04)	4.19 (3.04,5.47)	1265.35 (958.04,1733.55)	2.55 (1.93,3.5)	-1.44 (-1.6 to -1.29)
148	Djibouti	27.11 (18.42,36.33)	3.62 (2.46,4.86)	36.96 (25.74,50.07)	2.55 (1.78,3.46)	-1.25 (-1.46 to -1.05)
63	Denmark	136.75 (112.94,158.12)	4.47 (3.69,5.16)	77.39 (53.25,104.77)	2.52 (1.74,3.42)	-1.55 (-1.66 to -1.43)
153	Malawi	893.49 (605.3,1218.43)	3.73 (2.52,5.08)	685.67 (479.65,954.55)	2.51 (1.76,3.5)	-1.32 (-1.42 to -1.23)
146	Burundi	411.8 (278.74,562.85)	3.3 (2.23,4.51)	559.85 (398.29,762.73)	2.5 (1.78,3.4)	-0.75 (-0.92 to -0.58)
156	Rwanda	458.91 (307.91,639.32)	3.01 (2.02,4.19)	440.19 (313.67,595.57)	2.49 (1.77,3.36)	-0.65 (-0.81 to -0.48)
92	Dominican Republic	240.58 (164,324.59)	2.23 (1.52,3.01)	255.56 (175.36,352.89)	2.49 (1.71,3.44)	0.56 (0.44 to 0.69)
110	Nicaragua	259.54 (187.13,340.95)	3.8 (2.74,4.99)	152.29 (108.48,209.72)	2.48 (1.76,3.41)	-1.51 (-1.6 to -1.43)
170	Cameroon	752.47 (495.28,1024.95)	3.29 (2.16,4.48)	1234.84 (861.33,1719.1)	2.48 (1.73,3.46)	-0.82 (-0.91 to -0.74)
183	Sao Tome and Principe	8.04 (5.4,10.95)	3.62 (2.44,4.94)	5.84 (4.08,7.82)	2.47 (1.72,3.3)	-1.29 (-1.35 to -1.22)
140	Angola	780.99 (536.86,1050.11)	3.24 (2.23,4.36)	1432.52 (983.31,1950.79)	2.47 (1.7,3.37)	-0.88 (-0.96 to -0.81)
145	Gabon	53.67 (36.7,72.33)	3.14 (2.15,4.24)	51.06 (34.51,69.92)	2.47 (1.67,3.39)	-0.76 (-0.92 to -0.6)
98	Saint Vincent and the Grenadines	6.29 (4.91,7.75)	5.09 (3.97,6.27)	1.53 (1.09,2.1)	2.44 (1.74,3.35)	-2.14 (-2.42 to -1.87)
39	North Macedonia	74.41 (57.03,92.65)	4.56 (3.5,5.68)	22.12 (15.42,29.84)	2.44 (1.7,3.29)	-2.33 (-2.55 to -2.11)
160	Uganda	1405.96 (957.38,1937.1)	3.18 (2.17,4.38)	1837.17 (1243.08,2548.46)	2.43 (1.64,3.37)	-0.97 (-1.12 to -0.82)
58	New Zealand	82.39 (57.86,110.5)	2.84 (2,3.81)	70.48 (51.37,92.69)	2.38 (1.74,3.13)	-0.6 (-0.67 to -0.54)
2	Democratic People's Republic of Korea	733.53 (533.55,963.95)	2.84 (2.07,3.74)	336.78 (239.44,448.56)	2.38 (1.7,3.18)	-0.73 (-0.95 to -0.51)
68	Iceland	6.87 (5.01,8.92)	3.08 (2.25,4.01)	5.24 (3.56,7.18)	2.36 (1.6,3.23)	-0.93 (-0.99 to -0.87)
40	Montenegro	13.26 (9.38,18)	2.77 (1.96,3.76)	7.9 (5.49,10.72)	2.34 (1.62,3.17)	-0.58 (-0.6 to -0.56)
33	Albania	106.28 (75.78,141.25)	2.73 (1.95,3.63)	31.04 (21.53,42.23)	2.33 (1.61,3.16)	-0.79 (-0.91 to -0.66)
102	Ecuador	481.45 (365.3,601.5)	3.33 (2.52,4.16)	355.12 (281.05,444.02)	2.31 (1.82,2.88)	-1.09 (-1.17 to -1)
37	Czechia	269.91 (221.14,315.69)	4.36 (3.57,5.1)	118.37 (79.54,160.73)	2.31 (1.56,3.14)	-1.51 (-1.72 to -1.3)
188	Bermuda	0.86 (0.58,1.19)	2.01 (1.35,2.78)	0.54 (0.35,0.8)	2.3 (1.49,3.39)	0.72 (0.6 to 0.83)
1	China	42074.37 (31740.76,52389.64)	3.81 (2.87,4.74)	12021.79 (9004.33,15250.79)	2.27 (1.7,2.88)	-1.8 (-2 to -1.59)
36	Croatia	71.27 (61.45,82.16)	2.67 (2.3,3.08)	38.3 (27.59,49.85)	2.27 (1.63,2.95)	-0.36 (-0.56 to -0.16)
186	Togo	254.92 (173.69,351.46)	3.31 (2.26,4.57)	264.56 (186.35,364.52)	2.27 (1.6,3.13)	-1.35 (-1.43 to -1.26)
65	France	1025.85 (936.06,1110.84)	2.78 (2.54,3.02)	746.81 (559.58,894.75)	2.25 (1.69,2.7)	-0.44 (-0.55 to -0.34)
111	Panama	55.47 (36.05,79.41)	1.96 (1.27,2.8)	76.19 (47.5,109.94)	2.25 (1.4,3.24)	0.65 (0.5 to 0.8)
34	Bosnia and Herzegovina	76.92 (52.93,104.21)	2.37 (1.63,3.21)	30 (20.75,39.89)	2.24 (1.55,2.99)	-0.33 (-0.45 to -0.21)
141	Central African Republic	164.21 (111.4,223.9)	2.71 (1.84,3.7)	202.87 (143.94,274.74)	2.23 (1.58,3.02)	-0.48 (-0.56 to -0.4)
96	Jamaica	54.75 (37.76,75.84)	1.98 (1.36,2.74)	35.35 (24.2,51.61)	2.23 (1.53,3.26)	0.69 (0.56 to 0.82)
108	Honduras	241.08 (170.52,325.15)	2.81 (1.99,3.79)	237.27 (166.95,317.02)	2.22 (1.56,2.97)	-0.7 (-0.79 to -0.6)
81	Argentina	1005.08 (745.39,1301.45)	3.01 (2.23,3.9)	571.27 (390.66,767.01)	2.22 (1.52,2.98)	-0.97 (-1.36 to -0.57)
192	Monaco	0.39 (0.28,0.53)	3 (2.14,4.12)	0.34 (0.22,0.46)	2.2 (1.46,2.98)	-1.07 (-1.19 to -0.95)
178	Liberia	217.9 (144.65,292.44)	4.03 (2.68,5.41)	168.4 (118.76,231.36)	2.16 (1.52,2.97)	-1.84 (-2.03 to -1.65)
71	Italy	756.29 (583.54,940.26)	2.81 (2.17,3.49)	418.17 (325.35,514.85)	2.15 (1.68,2.65)	-0.83 (-0.96 to -0.71)
142	Congo	124.61 (85,168.89)	2.85 (1.94,3.86)	131.32 (89.63,178.04)	2.15 (1.47,2.92)	-0.92 (-0.98 to -0.87)
100	Trinidad and Tobago	20.32 (13.45,28.66)	1.77 (1.17,2.5)	15.29 (9.85,23.21)	2.14 (1.38,3.25)	0.92 (0.75 to 1.08)
52	Ukraine	942.63 (665.51,1263.46)	2.93 (2.07,3.92)	279.86 (195.66,367.12)	2.12 (1.48,2.78)	-0.88 (-0.99 to -0.78)
93	Grenada	2.15 (1.43,2.98)	1.85 (1.23,2.57)	1.36 (0.95,2.03)	2.11 (1.46,3.13)	0.69 (0.49 to 0.89)
60	Austria	154.5 (132.99,176.71)	3.46 (2.98,3.96)	86.36 (58.72,116.97)	2.11 (1.43,2.86)	-1.52 (-1.58 to -1.45)
151	Kenya	1345.67 (925.49,1830.3)	2.85 (1.96,3.88)	1181.27 (849.92,1604.7)	2.09 (1.5,2.83)	-1.02 (-1.2 to -0.83)
95	Haiti	292.55 (200.11,393.9)	2.42 (1.65,3.25)	342.52 (243.32,482.81)	2.09 (1.48,2.94)	-0.27 (-0.37 to -0.16)
69	Ireland	79.75 (69.89,89.09)	3.04 (2.67,3.4)	56.69 (39.53,73.38)	2.09 (1.46,2.71)	-1.07 (-1.38 to -0.77)
198	Saint Kitts and Nevis	0.8 (0.53,1.17)	1.8 (1.19,2.62)	0.58 (0.38,0.86)	2.09 (1.38,3.08)	0.81 (0.65 to 0.97)
87	Bahamas	5.09 (3.31,7.32)	1.92 (1.24,2.76)	3.99 (2.61,6.09)	2.08 (1.36,3.17)	0.66 (0.49 to 0.84)
154	Mauritius	18.02 (12.15,25.12)	1.62 (1.09,2.26)	12.67 (8.03,19.08)	2.08 (1.32,3.13)	0.62 (0.52 to 0.71)
89	Belize	7.55 (5.28,9.97)	2.5 (1.75,3.29)	7.62 (5.4,10.72)	2.07 (1.47,2.91)	-0.28 (-0.45 to -0.11)
88	Barbados	3.79 (2.45,5.43)	1.89 (1.22,2.71)	2.62 (1.77,3.82)	2.07 (1.4,3.02)	0.55 (0.4 to 0.71)
113	Brazil	3696.49 (2922.49,4563.93)	2.39 (1.89,2.95)	3258.49 (2467.88,4131.94)	2.05 (1.55,2.6)	-0.19 (-0.31 to -0.06)
49	Lithuania	56.48 (36.2,79.88)	2.08 (1.34,2.95)	23.5 (14.46,33.45)	2.05 (1.26,2.92)	-0.27 (-0.67 to 0.13)
43	Serbia	196.58 (136.37,266.47)	2.97 (2.06,4.03)	65.67 (42.01,90.11)	2.03 (1.3,2.79)	-1.44 (-1.52 to -1.35)
97	Saint Lucia	2.91 (1.91,4.13)	1.7 (1.12,2.41)	1.61 (1.12,2.34)	1.99 (1.38,2.9)	0.85 (0.68 to 1.02)
44	Slovakia	95.17 (66.4,126.88)	2.49 (1.74,3.33)	52.9 (35.23,72.9)	1.98 (1.32,2.72)	-0.58 (-0.93 to -0.24)
106	El Salvador	236.56 (172.03,307.4)	2.83 (2.06,3.68)	110.35 (79.1,153.65)	1.97 (1.41,2.75)	-1.14 (-1.21 to -1.07)
78	Sweden	182.61 (129.34,246.75)	3.06 (2.17,4.13)	106.07 (70.46,145.29)	1.93 (1.28,2.65)	-0.9 (-1.05 to -0.75)
143	Democratic Republic of the Congo	2580.71 (1732.46,3444.97)	3 (2.01,4.01)	2607.05 (1848.67,3533.29)	1.91 (1.35,2.58)	-1.6 (-1.67 to -1.53)
46	Belarus	204.23 (141.59,270.96)	2.99 (2.07,3.96)	74.96 (50.36,105.25)	1.88 (1.26,2.64)	-1.72 (-1.79 to -1.65)
61	Belgium	189.39 (163.05,214.82)	3.14 (2.71,3.56)	102.38 (75.32,132.01)	1.86 (1.37,2.4)	-1.34 (-1.66 to -1.03)
85	United States of America	3612.64 (2548.37,4791.67)	1.81 (1.27,2.39)	3219.88 (2251.31,4263.32)	1.82 (1.27,2.41)	0.09 (0.03 to 0.14)
41	Poland	588.99 (423.24,758.75)	2.24 (1.61,2.89)	297.66 (213.05,390.97)	1.81 (1.3,2.38)	-0.76 (-0.95 to -0.57)
48	Latvia	31.65 (20.84,44.27)	1.79 (1.18,2.5)	14.52 (9.26,20.36)	1.79 (1.14,2.51)	0.04 (-0.03 to 0.11)
14	Viet Nam	1545.06 (1110.16,1999.89)	1.66 (1.19,2.15)	1323.17 (968.32,1707.29)	1.78 (1.3,2.29)	0.26 (0.19 to 0.34)
82	Chile	404.01 (297.78,520.88)	2.76 (2.03,3.55)	173.14 (114.12,236.59)	1.78 (1.17,2.43)	-1.69 (-2.09 to -1.3)
51	Russian Federation	2420.24 (1740.64,3098.27)	2.54 (1.83,3.26)	1152.88 (803.54,1548.83)	1.77 (1.23,2.38)	-1.24 (-1.29 to -1.18)
104	Colombia	1475.63 (1099.19,1874.65)	3.34 (2.49,4.24)	567.3 (389.93,788.53)	1.75 (1.2,2.44)	-1.87 (-2.13 to -1.61)
90	Cuba	151.35 (103.86,203.18)	1.77 (1.21,2.37)	78.38 (50.7,116.59)	1.63 (1.05,2.42)	-0.01 (-0.12 to 0.1)
50	Republic of Moldova	64.9 (41.82,92.35)	1.7 (1.1,2.42)	22.11 (14.05,31.73)	1.63 (1.04,2.34)	-0.12 (-0.21 to -0.02)
193	Nauru	0.27 (0.18,0.39)	1.61 (1.06,2.28)	0.23 (0.15,0.32)	1.62 (1.11,2.29)	-0.02 (-0.09 to 0.05)
191	Guam	2.49 (1.59,3.63)	1.37 (0.87,2)	2.02 (1.32,3.04)	1.59 (1.04,2.4)	0.57 (0.5 to 0.64)
38	Hungary	220.57 (180.89,255.26)	3.65 (2.99,4.22)	67.21 (45.26,92.55)	1.58 (1.06,2.17)	-2 (-2.33 to -1.68)
187	American Samoa	1.14 (0.74,1.67)	1.35 (0.87,1.98)	0.5 (0.33,0.73)	1.55 (1.03,2.26)	0.33 (0.24 to 0.42)
77	Spain	427.95 (397.36,455.73)	2.23 (2.07,2.38)	246.98 (183.21,322.13)	1.53 (1.14,2)	-0.98 (-1.08 to -0.89)
20	Samoa	3.66 (2.5,5.17)	1.41 (0.97,2)	4.43 (3.1,6.26)	1.49 (1.04,2.11)	0.19 (0.1 to 0.27)
190	Greenland	1.03 (0.77,1.32)	1.78 (1.32,2.28)	0.55 (0.4,0.73)	1.48 (1.07,1.95)	-0.58 (-0.69 to -0.47)
19	Papua New Guinea	91.25 (61.41,130.32)	1.29 (0.87,1.84)	242.67 (170.38,350.91)	1.48 (1.04,2.14)	0.42 (0.34 to 0.51)
194	Niue	0.03 (0.02,0.04)	1.35 (0.89,1.93)	0.02 (0.01,0.02)	1.44 (0.99,2.03)	0.11 (0.04 to 0.18)
22	Tonga	2.04 (1.37,2.96)	1.31 (0.88,1.9)	2.03 (1.4,3)	1.42 (0.98,2.1)	0.28 (0.21 to 0.35)
196	Palau	0.2 (0.14,0.29)	1.36 (0.91,1.96)	0.12 (0.08,0.17)	1.42 (0.98,2.02)	0.13 (0.06 to 0.2)
17	Marshall Islands	0.96 (0.64,1.41)	1.33 (0.89,1.97)	0.78 (0.55,1.11)	1.41 (1,2.03)	0.15 (0.03 to 0.27)
76	Portugal	165.46 (134.4,194.64)	2.99 (2.43,3.51)	55.59 (39.31,74.47)	1.41 (1,1.89)	-2.21 (-2.44 to -1.99)
195	Northern Mariana Islands	0.78 (0.5,1.18)	1.33 (0.85,2)	0.4 (0.26,0.6)	1.41 (0.92,2.09)	-0.08 (-0.23 to 0.07)
201	Tuvalu	0.23 (0.15,0.32)	1.38 (0.93,1.95)	0.18 (0.13,0.26)	1.4 (0.98,2.06)	-0.09 (-0.17 to 0)
200	Tokelau	0.02 (0.02,0.03)	1.38 (0.93,1.96)	0.01 (0.01,0.02)	1.4 (0.96,2.06)	-0.22 (-0.34 to -0.09)
189	Cook Islands	0.28 (0.18,0.41)	1.32 (0.87,1.92)	0.15 (0.1,0.21)	1.39 (0.91,2.03)	-0.01 (-0.08 to 0.05)
114	Paraguay	86.36 (61.37,113.93)	1.39 (0.99,1.83)	85.67 (62.3,114.09)	1.38 (1.01,1.84)	0.16 (0.08 to 0.24)
23	Vanuatu	3.97 (2.72,5.54)	1.36 (0.93,1.9)	5.77 (4.15,8.18)	1.37 (0.99,1.95)	0.01 (-0.09 to 0.11)
105	Costa Rica	54.39 (36.77,75.41)	1.39 (0.94,1.93)	35.61 (22.72,51.42)	1.36 (0.87,1.96)	0.38 (-0.19 to 0.96)
21	Solomon Islands	8.45 (5.71,12.4)	1.29 (0.87,1.89)	12.91 (9.15,18.64)	1.32 (0.94,1.91)	-0.11 (-0.22 to -0.01)
70	Israel	119.85 (90.75,144)	2.37 (1.79,2.85)	117.29 (77.74,159.4)	1.32 (0.88,1.8)	-1.57 (-1.71 to -1.43)
16	Kiribati	1.63 (1.14,2.4)	1.26 (0.88,1.85)	1.84 (1.3,2.65)	1.31 (0.93,1.89)	0.09 (-0.02 to 0.21)
18	Micronesia (Federated States of)	1.98 (1.33,2.76)	1.31 (0.88,1.82)	1.16 (0.82,1.64)	1.29 (0.91,1.84)	-0.11 (-0.2 to -0.02)
15	Fiji	10.14 (6.77,14.66)	1.12 (0.75,1.62)	10.34 (7.22,15.03)	1.19 (0.83,1.73)	0.22 (0.1 to 0.35)
83	Uruguay	35.73 (25.35,48.2)	1.33 (0.94,1.79)	19.93 (12.57,27.42)	1.17 (0.74,1.6)	-0.61 (-0.8 to -0.43)
84	Canada	323.98 (264.16,386.5)	1.66 (1.35,1.98)	147.17 (103.41,200.83)	0.83 (0.58,1.13)	-1.15 (-2.17 to -0.12)
